# Supplementary material for: Land cover succession for recently drained lakes in permafrost on the Yamal Peninsula, Western Siberia
Source: Copernicus journal article supplement (doi:10.5194/tc-18-4703-2024), 2024-10-17
Supplement: Supplementary file 1 [file tc-18-4703-2024-supplement.pdf]

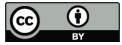

*Supplement of*

## **Land cover succession for recently drained lakes in permafrost on the Yamal Peninsula, Western Siberia**

**Clemens von Baeckmann et al.**

*Correspondence to:* Clemens von Baeckmann (clemens.von.baeckmann@bgeos.com)

The copyright of individual parts of the supplement might differ from the article licence.

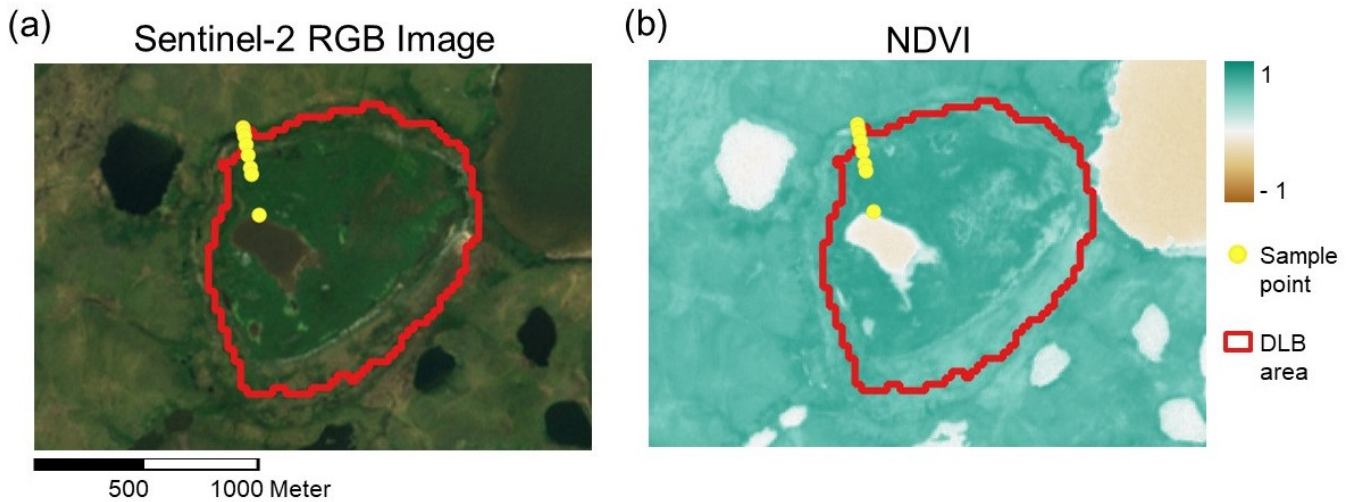

**Figure S 1.** Overview of collected *in situ* data (2016) at a lake located in Bioclimate subzone E drained in 2010 (a) Red, green and blue (RGB) Sentinel-2 composite for the 20.07.2016, six days before the *in situ* data were collected. (b) corresponding Normalized Difference Vegetation Index values. The lake extent in the red line is provided by the Landsat product from Nitze (2018) and refers to the maximum water area extent in 1999. For location see Figure 1 indicated as green triangle with the number 2, detailed coordinates are shown in Table A1 as well as the corresponding Landcover units are listed at the bottom of the table.

**Table S 1.** ‘Water’ fraction [%] for Drained Lake Basins separated into the two age groups and the bioclimate subzones, based on (Walker et al., 2005). The fraction is given for the quantiles: 25, 50 (median) and the 75.

| Bioclimate subzone | 1-5 [years] |      |       | 6-10 [years] |      |      |
|--------------------|-------------|------|-------|--------------|------|------|
|                    | q25         | q50  | q75   | q25          | q50  | q75  |
| B                  | 0.00        | 2.42 | 13.78 | 0.00         | 0.13 | 1.24 |
| C                  | 0.51        | 3.55 | 16.07 | 0.00         | 0.02 | 1.53 |
| D                  | 0.34        | 2.78 | 6.56  | 0.00         | 0.86 | 1.69 |
| E                  | 1.22        | 6.28 | 14.05 | 0.00         | 0.00 | 1.57 |

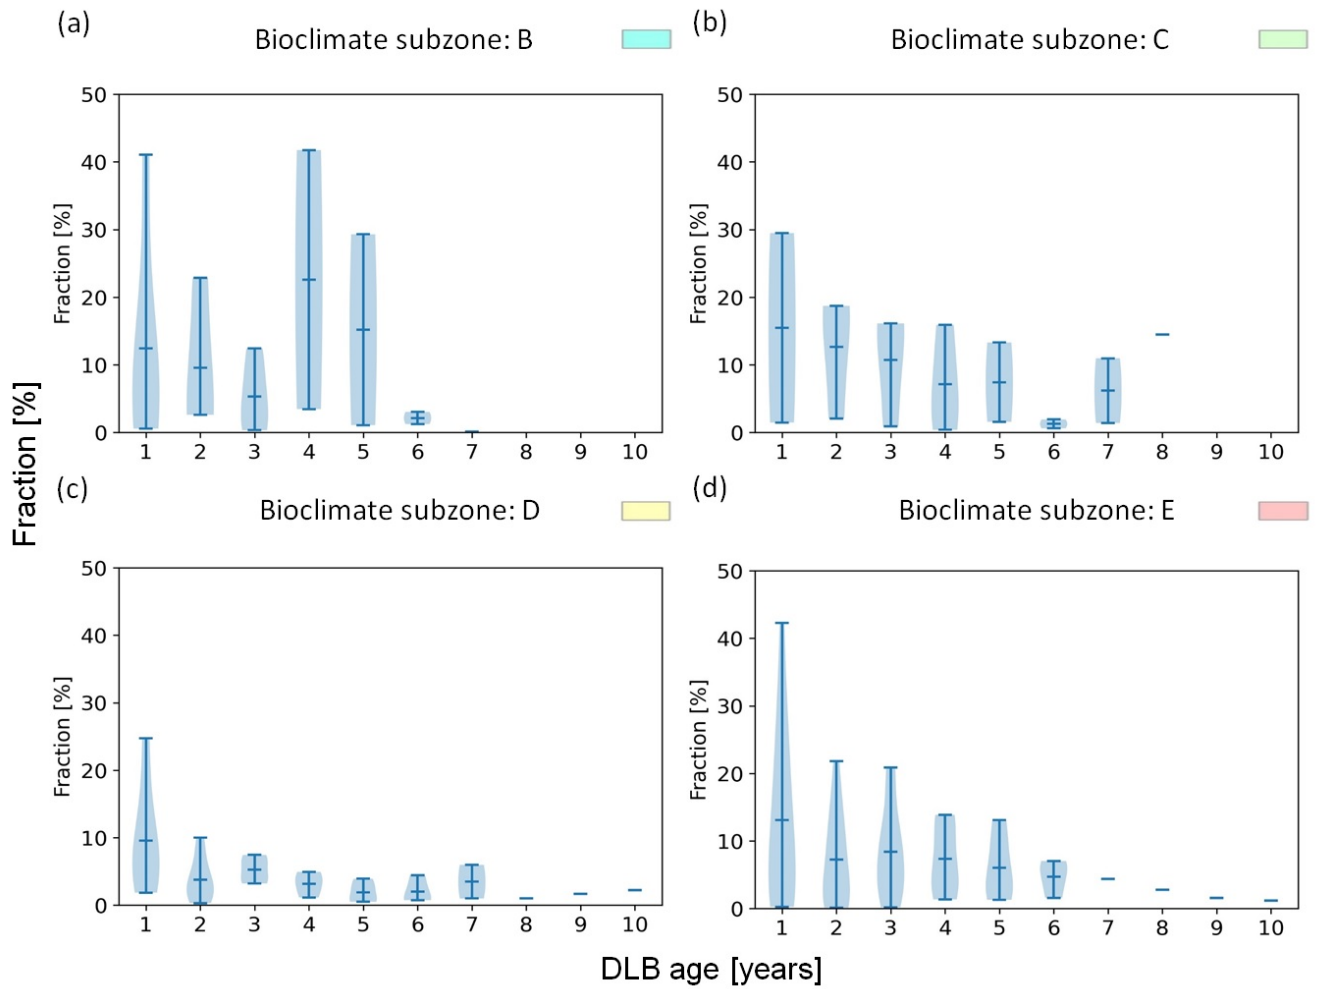

**Figure S 2.** Annual #1 'Water' fraction for different Drained Lake Basin ages (1-10), derived from the modified landcover classification approach using Sentinel-1 and Sentinel-2 data, based on (Bartsch et al., 2024). The data were separated into the different bioclimate subzones, based on (Walker et al., 2005).

**Table S 2.** Normalized Difference Vegetation Index data from Figure 2, based on Sentinel-2 satellite data. The data were separated into the different bioclimate subzones, based on (Walker et al., 2005).

| Subzone | Age | Min.   | q25    | q50   | q75   | Max.  |
|---------|-----|--------|--------|-------|-------|-------|
| B       | 0   | 0.244  | 0.299  | 0.339 | 0.440 | 0.636 |
| B       | 1   | 0.174  | 0.203  | 0.256 | 0.395 | 0.832 |
| B       | 2   | 0.178  | 0.23   | 0.339 | 0.406 | 0.804 |
| B       | 3   | 0.160  | 0.276  | 0.327 | 0.362 | 0.838 |
| B       | 4   | 0.219  | 0.236  | 0.283 | 0.49  | 0.822 |
| B       | 5   | 0.152  | 0.233  | 0.261 | 0.310 | 0.920 |
| B       | 6   | 0.119  | 0.180  | 0.200 | 0.585 | 0.658 |
| B       | 7   | 0.276  | 0.458  | 0.518 | 0.519 | 0.519 |
| C       | 0   | -0.039 | 0.143  | 0.326 | 0.362 | 0.399 |
| C       | 1   | 0.140  | 0.183  | 0.225 | 0.296 | 0.367 |
| C       | 2   | 0.202  | 0.25   | 0.299 | 0.336 | 0.373 |
| C       | 3   | 0.202  | 0.208  | 0.235 | 0.304 | 0.435 |
| C       | 4   | 0.200  | 0.216  | 0.312 | 0.357 | 0.438 |
| C       | 5   | 0.226  | 0.279  | 0.333 | 0.465 | 0.596 |
| C       | 6   | 0.000  | 0.192  | 0.384 | 0.474 | 0.564 |
| C       | 7   | 0.453  | 0.473  | 0.494 | 0.528 | 0.562 |
| C       | 8   | 0.253  | 0.349  | 0.445 | 0.478 | 0.512 |
| C       | 9   | 0.000  | 0.250  | 0.500 | 0.565 | 0.631 |
| C       | 10  | 0.318  | 0.418  | 0.519 | 0.619 | 0.719 |
| D       | 0   | -0.548 | -0.047 | 0.026 | 0.255 | 0.394 |
| D       | 1   | -0.076 | 0.14   | 0.226 | 0.278 | 0.467 |
| D       | 2   | 0.000  | 0.189  | 0.311 | 0.432 | 0.677 |
| D       | 3   | 0.156  | 0.328  | 0.459 | 0.590 | 0.645 |
| D       | 4   | 0.215  | 0.444  | 0.597 | 0.746 | 0.762 |
| D       | 5   | 0.316  | 0.63   | 0.692 | 0.749 | 0.816 |
| D       | 6   | 0.370  | 0.415  | 0.449 | 0.637 | 0.783 |
| D       | 7   | 0.430  | 0.446  | 0.606 | 0.785 | 0.860 |
| D       | 8   | 0.499  | 0.534  | 0.554 | 0.582 | 0.645 |
| D       | 9   | 0.470  | 0.499  | 0.527 | 0.592 | 0.657 |
| D       | 10  | 0.528  | 0.541  | 0.554 | 0.588 | 0.622 |
| E       | 0   | -0.211 | -0.051 | 0.101 | 0.197 | 0.342 |
| E       | 1   | 0.101  | 0.165  | 0.189 | 0.267 | 0.303 |
| E       | 2   | 0.114  | 0.190  | 0.296 | 0.378 | 0.648 |
| E       | 3   | 0.176  | 0.374  | 0.533 | 0.665 | 0.719 |
| E       | 4   | 0.246  | 0.478  | 0.603 | 0.610 | 0.777 |
| E       | 5   | 0.378  | 0.493  | 0.629 | 0.710 | 0.794 |
| E       | 6   | 0.533  | 0.54   | 0.636 | 0.746 | 0.791 |
| E       | 7   | 0.585  | 0.596  | 0.607 | 0.618 | 0.629 |
| E       | 8   | 0.538  | 0.58   | 0.622 | 0.704 | 0.786 |
| E       | 9   | 0.534  | 0.553  | 0.602 | 0.674 | 0.762 |
| E       | 10  | 0.530  | 0.595  | 0.670 | 0.728 | 0.739 |

**Table S 3.** Drained Lake Basin data included in the analysis. Location and ID is derived from (Nitze, 2018). Drainage date is determined using the Landcover and Landsat products (30 m) dating back to 1984. The bioclimate subzone data were derived from (Walker et al., 2005).

| ID    | Subzone | Latitude          | Longitude         | Area [km <sup>2</sup> ] | Drainage date |
|-------|---------|-------------------|-------------------|-------------------------|---------------|
| 60    | B       | 73.42496079281094 | 70.66280500190017 | 0.107                   | 2017          |
| 152   | B       | 73.39870352619491 | 70.7975522861476  | 0.316                   | 2015          |
| 1101  | B       | 73.22080786365424 | 70.99237480663685 | 0.03                    | 2016          |
| 1397  | B       | 73.18765795505774 | 71.23013640235338 | 0.038                   | 2016          |
| 2342  | B       | 73.11221959595294 | 70.7834482074645  | 0.024                   | 2016          |
| 2765  | B       | 73.04785216110457 | 70.27043252486669 | 0.034                   | 2019          |
| 15334 | C       | 71.10768897791277 | 69.26384069338911 | 0.138                   | 2019          |
| 5504  | C       | 72.41697149803784 | 70.24380790390939 | 0.068                   | 2018          |
| 5189  | C       | 72.46121124669517 | 71.5627966727732  | 0.737                   | 2012          |
| 3224  | C       | 72.78499037075007 | 71.77303064621684 | 0.767                   | 2012          |
| 2992  | C       | 72.86341178148271 | 69.5189399696544  | 1.204                   | 2018          |
| 4551  | C       | 72.56758331586641 | 69.93868751526004 | 0.499                   | 2013          |
| 43024 | D       | 69.0696083304567  | 72.19550772080771 | 3.179                   | 2008          |
| 45136 | D       | 68.96382593086201 | 72.03809588636902 | 0.975                   | 2015          |
| 44757 | D       | 68.99399191150049 | 71.78470296267571 | 0.868                   | 2019          |
| 44535 | D       | 68.9977304827651  | 72.18412163847461 | 6.879                   | 2017          |
| 44130 | D       | 69.00726314342529 | 72.24935541980412 | 3.092                   | 2017          |
| 43444 | D       | 69.04332758055628 | 72.06763470084069 | 1.541                   | 2019          |
| 43073 | D       | 69.0893735586727  | 69.25202774779163 | 0.544                   | 2020          |
| 41752 | D       | 69.14638644377233 | 72.18537894738694 | 2.637                   | 2014          |
| 43948 | D       | 69.0234699279156  | 71.93920417439911 | 3.083                   | 2021          |
| 18036 | D       | 70.87728018214749 | 69.96671575233711 | 0.081                   | 2016          |
| 29547 | D       | 69.97648183379864 | 67.71872513449718 | 1.761                   | 2015          |
| 28467 | D       | 70.09743845627929 | 68.46392482356914 | 1.133                   | 2008          |
| 28071 | D       | 70.0950199842196  | 68.30882984224023 | 0.491                   | 2012          |
| 27002 | D       | 70.17369543135061 | 68.60297406124826 | 0.62                    | 2017          |
| 25864 | D       | 70.23586657005812 | 68.95626397721364 | 0.125                   | 2019          |
| 18998 | D       | 70.79820743092132 | 70.66879775349473 | 0.787                   | 2019          |
| 31745 | D       | 69.8233217077125  | 68.96277490728492 | 0.055                   | 2020          |
| 66865 | E       | 67.98177923184201 | 69.53663823249592 | 0.425                   | 2007          |
| 70186 | E       | 67.83527436585686 | 69.62716062115058 | 0.22                    | 2017          |
| 78400 | E       | 67.4622912423868  | 69.93811915306644 | 0.251                   | 2008          |
| 42462 | E       | 69.11973388904843 | 70.7003886061984  | 1.033                   | 1998          |
| 80238 | E       | 67.37940487721932 | 70.73008874630575 | 1.871                   | 2016          |
| 83556 | E       | 67.23609332608558 | 70.02293818188993 | 0.123                   | 2017          |
| 65642 | E       | 68.0434697280821  | 69.3845265569131  | 0.462                   | 2012          |
| 89993 | E       | 66.96822179973609 | 70.97114077757635 | 0.431                   | 2019          |
| 78612 | E       | 67.45004225716005 | 70.11777460022633 | 0.262                   | 2019          |
| 59181 | E       | 68.30095698084298 | 69.36511154390466 | 0.037                   | 2019          |
| 47481 | E       | 68.85976636255484 | 70.34248987389802 | 0.655                   | 2019          |
| 54705 | E       | 68.49595893530632 | 69.5223983537476  | 0.315                   | 2019          |
| 52037 | E       | 68.61822293555427 | 70.33177545034474 | 0.274                   | 2011          |
| 51483 | E       | 68.6525399397403  | 69.5836608444853  | 0.518                   | 2018          |
| 47372 | E       | 68.86439845532495 | 70.32060503706411 | 0.143                   | 2017          |
| 47065 | E       | 68.85643932518332 | 72.55127202246585 | 3.475                   | 2016          |
| 46651 | E       | 68.89195872910393 | 72.36428189115449 | 4.712                   | 2019          |
| 46336 | E       | 68.9092185090751  | 72.30286385025849 | 3.101                   | 2019          |
| 46233 | E       | 68.90359800248113 | 72.49975544764956 | 0.7                     | 2019          |
| 91816 | E       | 66.8843802526535  | 69.47439348834514 | 0.274                   | 2020          |
| 58946 | E       | 68.31347458615622 | 69.31405136414543 | 0.253                   | 2004          |
| 92742 | E       | 66.82090216288238 | 70.60994481629932 | 0.145                   | 2019          |

## References

- Bartsch, A., Efimova, A., Widhalm, B., Muri, X., von Baeckmann, C., Bergstedt, H., Ermokhina, K., Hugelius, G., Heim, B., and Leibman, M.: Circumarctic land cover diversity considering wetness gradients, *Hydrology and Earth System Sciences*, 28, 2421–2481, <https://doi.org/10.5194/hess-28-2421-2024>, 2024.
- 5 Nitze, I.: Trends of land surface change from Landsat time-series 1999-2014, <https://doi.org/10.1594/PANGAEA.884137>, 2018.
- Walker, D. A., Raynolds, M. K., Daniëls, F. J., Einarsson, E., Elvebakk, A., Gould, W. A., Katenin, A. E., Kholod, S. S., Markon, C. J., Melnikov, E. S., Moskalenko, N. G., Talbot, S. S., Yurtsev, B. A., and other members of the CAVM Team, T.: The Circumpolar Arctic vegetation map, *Journal of Vegetation Science*, 16, 267–282, <https://doi.org/10.1111/j.1654-1103.2005.tb02365.x>, 2005.
